# Supplementary material for: The economic burden of cancers attributable to smoking in Korea, 2014
Source: PubMed Central journal article supplement (PMC6751966; doi:10.18332/tid/102673), 2019-02-28
Supplement: TID-17-15-s1.pdf [file TID-17-15-s1.pdf]

**Supplementary Table 1. Types of costs, description, and sources of data**

| <b>Type of costs</b> |                          | <b>Description</b>                          | <b>Data sources</b>                            |
|----------------------|--------------------------|---------------------------------------------|------------------------------------------------|
| Direct costs         | Direct medical costs     | Medical care covered by NHIS                | NHIS claims data (2014)                        |
|                      |                          | Medical care not covered by NHIS            | Survey on the Benefit Coverage Rate of NHIS    |
|                      | Direct non-medical costs |                                             |                                                |
|                      | Transportation costs     | One-way cost per visit                      | Korea Health Panel Survey (2014)               |
|                      |                          | Frequency of inpatient/outpatient visits    | NHIS claims data (2014)                        |
|                      | Caregivers' costs        | Days of inpatient admission                 | NHIS claims data (2014)                        |
|                      |                          | Frequency of over-65-aged outpatients       | NHIS claims data (2014)                        |
|                      |                          | Caregivers' daily wage and utilization rate | Korea Health Panel Survey (2014)               |
|                      | Indirect costs           | Future income loss                          | Number of cancer specific deaths               |
| Employment rates     |                          |                                             | Ministry of Employment and Labor, Korea (2014) |
| Life expectancy      |                          |                                             | Life tables, Statistics Korea (2014)           |
| Productivity loss    |                          | Frequency of inpatient/outpatient visits    | NHIS claims data (2014)                        |
|                      |                          | Employment rates                            | Ministry of Employment and Labor, Korea (2014) |
|                      |                          | Average daily wage                          | Ministry of Employment and Labor, Korea (2014) |
| Job loss             |                          | Number of cancer cases                      | NHIS claims data (2014)                        |
|                      |                          | Job loss average rate                       | Park J.H. et al (2008)                         |
|                      |                          | Employment rates                            | Ministry of Employment and Labor, Korea (2014) |
|                      |                          | Average daily wage                          | Ministry of Employment and Labor, Korea (2014) |
